# Supplementary material for: Universal genotyping reveals province-level differences in the molecular epidemiology of tuberculosis
Source: PLOS journal article supplement (doi:10.1371/journal.pone.0214870), 2019-04-03
Supplement: S3 (10.1371/journal.pone.0214870.s003) [file journal.pone.0214870.s003]

**S3 Table.** Multivariable analysis of factors associated with single and multi ( $\geq 2$  isolates) contributors to an interprovincial 24-MIRU-VNTR cluster, Ontario and British Columbia 2008–2014.

| Characteristic          | Multi vs. Single<br><b>OR (95%CI)</b> | Multi vs. Single<br><b>aOR* (95%CI)</b> |
|-------------------------|---------------------------------------|-----------------------------------------|
| Age, years              |                                       |                                         |
| 0-14                    | 1.4 (0.3–6.3)                         | 1.0 (0.2–4.8)                           |
| 15-34                   | Reference                             | Reference                               |
| 35-54                   | 1.5 (1.0–2.3)                         | 1.4 (0.9–2.2)                           |
| 55–74                   | 1.2 (0.8–1.8)                         | 1.2 (0.8–1.9)                           |
| 75+                     | 1.0 (0.6–1.7)                         | 1.3 (0.7–2.1)                           |
| Sex                     |                                       |                                         |
| Female                  | Reference                             | Reference                               |
| Male                    | 1.3 (0.9–1.7)                         | 1.2 (0.8–1.6)                           |
| Province of residence   |                                       |                                         |
| Ontario                 | Reference                             | Reference                               |
| British Columbia        | 0.6 (0.5–0.9)                         | 0.6 (0.4–0.8)                           |
| Community type          |                                       |                                         |
| Metro                   | 1.9 (1.0–3.8)                         | 2.7 (1.2–5.8)                           |
| Urban, high-density     | 1.2 (0.6–2.4)                         | 1.9 (0.9–4.1)                           |
| Urban, moderate-density | 1.7 (0.7–4.0)                         | 2.2 (0.9–5.7)                           |
| Rural/Remote            | Reference                             | Reference                               |
| Birthplace              |                                       |                                         |
| Canada                  | 3.3 (1.9–6.0)                         | 8.0 (3.8–16.6)                          |
| Outside Canada          | Reference                             | Reference                               |
| Lineage                 |                                       |                                         |
| L1                      | 1.0 (0.6–1.6)                         | 2.4 (1.4–4.2)                           |
| L2                      | 0.9 (0.6–1.4)                         | 2.0 (1.2–3.5)                           |
| L3                      | 0.6 (0.4–1.0)                         | 1.4 (0.8–2.6)                           |
| L4                      | Reference                             | Reference                               |

Abbreviations: OR—odds ratio; CI—confidence interval; aOR—adjusted odds ratio.

\*Adjusted for age, sex, province, community type, birthplace, lineage.
