# Supplementary material for: Universal genotyping reveals province-level differences in the molecular epidemiology of tuberculosis
Source: PLOS journal article supplement (doi:10.1371/journal.pone.0214870), 2019-04-03
Supplement: S4 (10.1371/journal.pone.0214870.s004) [file journal.pone.0214870.s004]

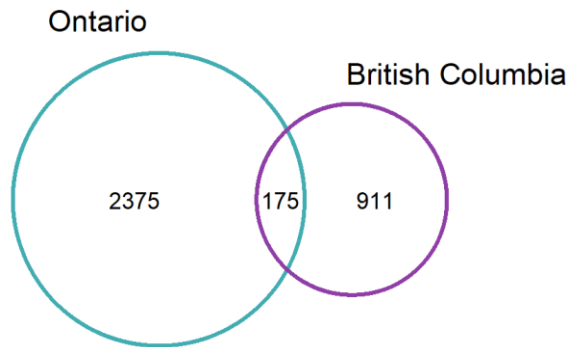

**S1 Fig.** Venn diagram representing the number of unique and shared 24-locus MIRU-VNTR genotypes between Ontario and British Columbia, 2008–2014.
